# Supplementary material for: Comparison of the Efficacy and Safety of Early Rule-Out Pathways for Acute Myocardial Infarction
Source: PubMed Central journal article supplement — Circulation. 2017 Apr 24;135(17):1586–96. doi: 10.1161/CIRCULATIONAHA.116.025021 (PMC5404406; doi:10.1161/circulationaha.116.025021), 2017-04-24
Supplement: cir-135-1586-s001.pdf [file cir-135-1586-s001.pdf]

## SUPPLEMENTAL MATERIAL

### **Comparison of the efficacy and safety of early rule out pathways for acute myocardial infarction**

Andrew R Chapman MD,<sup>1</sup> Atul Anand MD,<sup>1</sup> Jasper Boeddinghaus MD,<sup>2</sup> Amy V Ferry BSc,<sup>1</sup>  
Dennis Sandeman MSc,<sup>1</sup> Philip D Adamson MD,<sup>1</sup> Jack Andrews MD,<sup>1</sup> Stephanie Tan MD,<sup>1</sup>  
Sheun F Cheng,<sup>1</sup> Michelle D'Souza BSc,<sup>1</sup> Kate Orme BSc,<sup>1</sup> Fiona E Strachan PhD,<sup>1</sup>  
Thomas Nestelberger MD,<sup>2</sup> Raphael Twerenbold MD,<sup>2</sup> Patrick Badertscher MD,<sup>2</sup>  
Tobias Reichlin MD,<sup>2</sup> Alasdair Gray MD,<sup>1,3,4</sup> Anoop SV Shah MD PhD,<sup>1</sup>  
Christian Mueller MD,<sup>2</sup> David E Newby MD PhD,<sup>1</sup> Nicholas L Mills MD PhD<sup>1</sup>

<sup>1</sup>*BHF Centre for Cardiovascular Science, University of Edinburgh, United Kingdom*

<sup>2</sup>*Cardiovascular Research Institute Basel (CRIB) and Department of Cardiology, University Hospital, Basel, Switzerland*

<sup>3</sup>*Department of Emergency Medicine, Royal Infirmary of Edinburgh, United Kingdom*

<sup>4</sup>*EMERGE Research Group, Royal Infirmary of Edinburgh, United Kingdom*

#### **Correspondence and requests for reprints:**

Dr Andrew R Chapman  
BHF Centre for Cardiovascular Science  
SU305 Chancellors Building  
Royal Infirmary of Edinburgh  
Edinburgh EH16 4SA  
United Kingdom

Email: [A.R.Chapman@ed.ac.uk](mailto:A.R.Chapman@ed.ac.uk)

**Table S1 – Baseline characteristics for the APACE external validation cohort**

|                                               | <b>APACE Study*<br/>(n=2,533)</b> |
|-----------------------------------------------|-----------------------------------|
| Age                                           | 61 (16.0)                         |
| Male (%)                                      | 1,722 (68.0)                      |
| <b>Primary Symptom</b>                        |                                   |
| Chest Pain                                    | 2,214 (87.4)                      |
| <b>Symptom onset</b>                          |                                   |
| Minutes since onset                           | 300 (120-720)                     |
| Less than three hours (%)                     | 717 (28.5)                        |
| Less than six hours (%)                       | 1,338 (53.2)                      |
| Over six hours (%)                            | 1,054 (41.9)                      |
| <b>Cardiovascular Risk Factors</b>            |                                   |
| Smoker (%)                                    | 635 (25.1)                        |
| Diabetes mellitus (%)                         | 451 (17.8)                        |
| Hypertension (%)                              | 1,591 (62.8)                      |
| Hyperlipidaemia (%)                           | 1,293 (51.0)                      |
| Family history (%)                            | 987 (40.9)                        |
| Known angina (%)                              | 883 (34.9)                        |
| Previous MI (%)                               | 621 (24.5)                        |
| Previous PCI (%)                              | 646 (25.5)                        |
| Previous CABG (%)                             | 228 (9.0)                         |
| Stroke (%)                                    | 149 (5.9)                         |
| Peripheral vascular disease (%)               | 146 (5.8)                         |
| <b>Troponin concentration at presentation</b> |                                   |
| <5 ng/L (%)                                   | 1,348 (53.2)                      |
| ≥5 ng/L and ≤ 99 <sup>th</sup> centile (%)    | 735 (29.0)                        |
| >99 <sup>th</sup> centile (%)                 | 450 (17.8)                        |
| <b>Adjudicated Diagnosis</b>                  |                                   |
| Type 1 myocardial infarction (%)              | 289 (11.4)                        |
| All myocardial infarction (%)                 | 378 (14.9)                        |

*\*The APACE study is a prospective cohort study of patients with suspected acute coronary syndrome presenting to the Emergency Department of Basel and six other centers in Europe between April 2006 and August 2015. Blood samples were obtained on presentation and at 3, and 6h for high-sensitivity cardiac troponin I testing. All diagnoses were adjudicated by two independent cardiologists; the diagnosis of type 1 myocardial infarction required at least one high-sensitivity cardiac troponin I concentration above the sex-specific 99<sup>th</sup> centile upper reference limit (16 ng/L women, 34 ng/L men). This study was approved by the local ethics committee.*

**Table S2. Patients ruled out by the ESC pathway at 0 and 3 hours meeting the primary outcome**

| Age | Gender | Time since symptom onset (Minutes) | Troponin concentration, ng/L (hours) | Relative Change (%) | Absolute Change | Presenting Symptom | Index Diagnosis | Risk Factors                                                                                 | Initial ECG                                       | Management    |
|-----|--------|------------------------------------|--------------------------------------|---------------------|-----------------|--------------------|-----------------|----------------------------------------------------------------------------------------------|---------------------------------------------------|---------------|
| 81  | Male   | 444                                | 31 (0)<br>33 (3)<br>39 (12)          | 6.5                 | 2               | Chest Pain         | Type 1 MI       | Hypertension<br>Hyperlipidaemia<br>Ischaemic Heart Disease<br>Previous CABG                  | Sinus Rhythm<br>ST Depression<br>T wave Inversion | PCI to LCx    |
| 57  | Male   | 440                                | 33 (0)<br>80 (3)<br>144 (5)          | 142.4               | 47              | Chest Pain         | Type 1 MI       | Previous Smoker<br>Family History of CHD                                                     | Sinus Rhythm                                      | PCI to OM1    |
| 70  | Male   | 375                                | 17 (0)<br>160 (3)<br>2583 (6)        | 841.2               | 143             | Chest Pain         | Type 1 MI       | Previous Smoker<br>Diabetes<br>Hypertension<br>Hyperlipidaemia<br>Previous MI                | Sinus Rhythm<br>RBBB                              | Medical       |
| 84  | Male   | 4900                               | 25 (0)<br>44 (3)                     | 76.0                | 19              | Chest Pain         | Type 1 MI       | Hypertension<br>Previous MI<br>Previous PCI<br>Previous CABG<br>Previous Stroke              | Atrial Fibrillation                               | PCI to SVG-D1 |
| 82  | Female | 86                                 | 11 (0)<br>15 (3)<br>26 (10)          | 36.4                | 4               | Chest Pain         | Type 1 MI       | Hypertension                                                                                 | Sinus Rhythm                                      | Medical       |
| 62  | Male   | 70                                 | 27 (0)<br>32 (3)<br>50 (11)          | 18.5                | 5               | Chest Pain         | Type 1 MI       | Current Smoker<br>Diabetes<br>Hypertension<br>Hyperlipidaemia<br>Previous MI<br>Previous PCI | Sinus Rhythm                                      | Medical       |
| 87  | Male   | 139                                | 5 (0)<br>16 (3)<br>691 (10)          | 220.0               | 11              | Chest Pain         | Type 1 MI       | Previous Smoker<br>Hypertension<br>Ischaemic Heart Disease<br>Previous CABG                  | Atrial Fibrillation<br>ST Depression              | Medical       |

|    |        |     |                              |       |    |            |           |                                                                                                                                       |                                           |                                  |
|----|--------|-----|------------------------------|-------|----|------------|-----------|---------------------------------------------------------------------------------------------------------------------------------------|-------------------------------------------|----------------------------------|
| 73 | Male   | 180 | 26 (0)<br>29 (3)<br>41 (9)   | 11.5  | 3  | Chest Pain | Type 1 MI | Previous Smoker<br>Hypertension<br>Hyperlipidaemia<br>Family history of CHD<br>Previous MI<br>Previous CABG                           | Sinus Rhythm<br>LBBB                      | Medical                          |
| 58 | Male   | 122 | 26 (0)<br>33 (3)<br>46 (11)  | 26.9  | 7  | Dyspnoea   | Type 1 MI | Previous Smoker<br>Diabetes<br>Family history of CHD<br>Ischaemic Heart Disease<br>Previous MI<br>Previous CABG<br>Previous Stroke    | Sinus Rhythm<br>T wave inversion          | Medical                          |
| 63 | Female | 151 | 10 (0)<br>16 (3)<br>167 (10) | 60.0  | 6  | Chest Pain | Type 1 MI | Current Smoker<br>Family history of CHD                                                                                               | Sinus Rhythm<br>ST Depression             | PCI to LAD                       |
| 66 | Male   | 89  | 12 (0)<br>31 (3)<br>202 (10) | 158.3 | 19 | Chest Pain | Type 1 MI | Hypertension<br>Previous MI<br>Previous PCI                                                                                           | Sinus Rhythm                              | Medical                          |
| 60 | Male   | 81  | 2 (0)<br>6 (3)<br>2932 (11)  | 200.0 | 4  | Chest Pain | Type 1 MI | Current Smoker<br>Family History of CHD<br>Ischaemic Heart Disease<br>Previous PCI                                                    | Sinus Rhythm<br>T wave inversion<br>(old) | PCI to RCA/D1                    |
| 56 | Male   | 262 | 8 (0)<br>14 (3)<br>307 (10)  | 75.0  | 6  | Chest Pain | Type 1 MI | Previous Smoker<br>Hypertension<br>Hyperlipidaemia<br>Family history of CHD<br>Ischaemic Heart Disease<br>Previous MI<br>Previous PCI | Sinus Rhythm                              | Medical                          |
| 77 | Male   | 272 | 21 (0)<br>26 (3)<br>56 (10)  | 23.8  | 5  | Chest Pain | Type 1 MI | Previous Smoker<br>Diabetes<br>Hypertension<br>Hyperlipidaemia<br>Family history of CHD<br>Previous MI<br>Previous PCI                | Atrial Fibrillation<br>Inferior Q waves   | Medical                          |
| 66 | Male   | 305 | 22 (0)<br>36 (3)             | 63.6  | 14 | Chest Pain | Type 1 MI | Ischaemic Heart Disease<br>Hypertension                                                                                               | Sinus Rhythm<br>Bradycardia               | PCI to LCx<br>Instent Restenosis |

|    |        |     |                                                                                     |      |   |            |                               |                                                                                                                                    |                                                                |                                                                                                              |
|----|--------|-----|-------------------------------------------------------------------------------------|------|---|------------|-------------------------------|------------------------------------------------------------------------------------------------------------------------------------|----------------------------------------------------------------|--------------------------------------------------------------------------------------------------------------|
|    |        |     | 50 (8)                                                                              |      |   |            |                               | Hyperlipidaemia<br>Previous MI<br>Previous PCI                                                                                     |                                                                |                                                                                                              |
| 60 | Male   | 295 | 14 (0)<br>14 (3)<br>170 (8)                                                         | 0    | 0 | Chest Pain | Type 1 MI                     | Current Smoker<br>Hypertension<br>Hyperlipidaemia<br>Family history of CHD<br>Ischaemic heart disease<br>Previous MI               | Sinus Rhythm<br>Bradycardia                                    | Angiography<br>70% stenosis OM1<br>Medical                                                                   |
| 88 | Female | 222 | 15 (0)<br>19 (3)                                                                    | 26.7 | 4 | Chest Pain | Type 1 MI                     | Ischaemic heart disease<br>Previous MI<br>Previous PCI<br>Family history of CHD                                                    | Sinus Rhythm                                                   | Medical                                                                                                      |
| 89 | Female | 165 | 16 (0)<br>18 (3)<br>24 (10)                                                         | 12.5 | 2 | Chest Pain | Type 1 MI                     | Hypertension<br>Family history of CHD<br>Ischaemic Heart Disease                                                                   | Sinus Rhythm                                                   | Medical                                                                                                      |
| 82 | Male   | 126 | 19 (0)<br>20 (3)<br>22 (11)<br><br>Re-attendance<br><br>52 (0)<br>44 (3)<br>24 (10) | 5.3  | 1 | Chest Pain | Musculoskeletal<br>Chest Pain | Previous Smoker<br>Diabetes<br>Hyperlipidaemia<br>Family history of CHD<br>Ischaemic Heart Disease<br>Previous MI<br>Previous CABG | Sinus Rhythm<br>First Degree HB<br>Left Axis Deviation<br>RBBB | Re-presented with<br>ongoing chest pain<br>two days post index<br>presentation<br><br>Missed Type 1 MI       |
| 73 | Female | 425 | 9 (0)<br>11 (3)                                                                     | 22.2 | 2 | Chest Pain | Paroxysmal AF                 | Previous Smoker<br>Hypertension<br>Hyperlipidaemia<br>Ischaemic Heart Disease<br>Previous MI<br>Previous PCI                       | Atrial Fibrillation<br>RBBB<br>T wave inversion                | Re-presented with<br>inferior STEMI 14<br>days post index<br>presentation<br><br>PCI to RCA<br><br>Type 1 MI |

**Demarcations for missed index events with ≥6 hours symptoms (n=4), <6 hours symptoms (n=14) and 30 day events (n=2)**

AF = atrial fibrillation, CABG = coronary artery bypass graft, CHD = coronary heart disease, LBBB = left bundle branch block, RBBB = right bundle branch block, MI = myocardial infarction, PCI = percutaneous coronary intervention, STEMI = ST-segment elevation myocardial infarction.

**Table S3. Patients ruled out by the High-STEACS pathway at 0 and 3 hours meeting the primary outcome**

| Age | Gender | Time since symptom onset (Minutes) | Troponin concentration, ng/L (hours)                                                | Relative Change (%) | Absolute Change | Presenting Symptom | Index Diagnosis               | Risk Factors                                                                                                                       | Initial ECG                                                    | Management                                                                                          |
|-----|--------|------------------------------------|-------------------------------------------------------------------------------------|---------------------|-----------------|--------------------|-------------------------------|------------------------------------------------------------------------------------------------------------------------------------|----------------------------------------------------------------|-----------------------------------------------------------------------------------------------------|
| 81  | Male   | 444                                | 31 (0)<br>33 (3)<br>39 (12)                                                         | 6.45                | 2               | Chest Pain         | Type 1 MI                     | Hypertension<br>Hyperlipidaemia<br>Ischaemic Heart Disease<br>Previous CABG                                                        | Sinus Rhythm<br>ST Depression<br>T wave Inversion              | PCI to LCx                                                                                          |
| 60  | Male   | 295                                | 14 (0)<br>14 (3)<br>170 (8)                                                         | 0                   | 0               | Chest Pain         | Type 1 MI                     | Current Smoker<br>Hypertension<br>Hyperlipidaemia<br>Family history of CHD<br>Ischaemic heart disease<br>Previous MI               | Sinus Rhythm<br>Bradycardia                                    | Angiography<br>70% stenosis OM1<br>Medical                                                          |
| 82  | Male   | 126                                | 19 (0)<br>20 (3)<br>22 (11)<br><br>Re-attendance<br><br>52 (0)<br>44 (3)<br>24 (10) | 5.3                 | 1               | Chest Pain         | Musculoskeletal<br>Chest Pain | Previous Smoker<br>Diabetes<br>Hyperlipidaemia<br>Family history of CHD<br>Ischaemic Heart Disease<br>Previous MI<br>Previous CABG | Sinus Rhythm<br>First Degree HB<br>Left Axis Deviation<br>RBBB | Re-presented with ongoing chest pain two days post index presentation<br><br>Missed Type 1 MI       |
| 73  | Female | 425                                | 9 (0)<br>11 (3)                                                                     | 22.2                | 2               | Chest Pain         | Paroxysmal AF                 | Previous Smoker<br>Hypertension<br>Hyperlipidaemia<br>Ischaemic Heart Disease<br>Previous MI<br>Previous PCI                       | Atrial Fibrillation<br>RBBB<br>T wave inversion                | Re-presented with inferior STEMI 14 days post index presentation<br><br>PCI to RCA<br><br>Type 1 MI |

**Demarcation for missed index events (n=2) and 30 day events (n=2)**

AF = atrial fibrillation, CABG = coronary artery bypass graft, CHD = coronary heart disease, LBBB = left bundle branch block, RBBB = right bundle branch block, MI = myocardial infarction, PCI = percutaneous coronary intervention. STEMI = ST-segment elevation myocardial infarction.

**Table S4 – 2x2 table for internal validation of delta criteria at three hours**

|                                 | Type 1 MI | No Type 1 MI |
|---------------------------------|-----------|--------------|
| Change $\geq 3$ ng/L at 3 hours | 40        | 52           |
| Change $< 3$ ng/L at 3 hours    | 2         | 216          |

*Patients with cardiac troponin concentrations  $\geq 5$  ng/L and  $< 99^{\text{th}}$  centile on presentation are re-tested at three hours. Those with a change in cardiac troponin of  $< 3$  ng/L are ruled out if they remain  $< 99^{\text{th}}$  centile.*



**Table S5 – 2x2 table for external validation of delta criteria at three hours**

|                                 | Type 1 MI | No Type 1 MI |
|---------------------------------|-----------|--------------|
| Change $\geq 3$ ng/L at 3 hours | 51        | 170          |
| Change $< 3$ ng/L at 3 hours    | 0         | 514          |

*Patients with cardiac troponin concentrations  $\geq 5$  ng/L and  $< 99^{\text{th}}$  centile on presentation are re-tested at three hours. Those with a change in cardiac troponin of  $< 3$  ng/L are ruled out if they remain  $< 99^{\text{th}}$  centile.*

**Table S6 – 2x2 table with diagnostic performance of the High-STEACS pathway at 6 hours**

|                   | Type 1 MI | No Type 1 MI |
|-------------------|-----------|--------------|
| Pathway rules in  | 187       | 88           |
| Pathway rules out | 4         | 939          |

*Patients with cardiac troponin concentrations  $<5$  ng/L who present over two hours from time of symptom onset are ruled out on presentation. Those  $\geq 5$  ng/L and  $<99^{\text{th}}$  centile on presentation, and those who present within two hours of symptom onset are re-tested at three hours. Those with a change in cardiac troponin of  $<3$  ng/L are ruled out if they remain  $<99^{\text{th}}$  centile, with all other patients admitted for peak testing at six hours.*

**Figure S1. Study population, adjudicated diagnosis and 30 day outcomes**

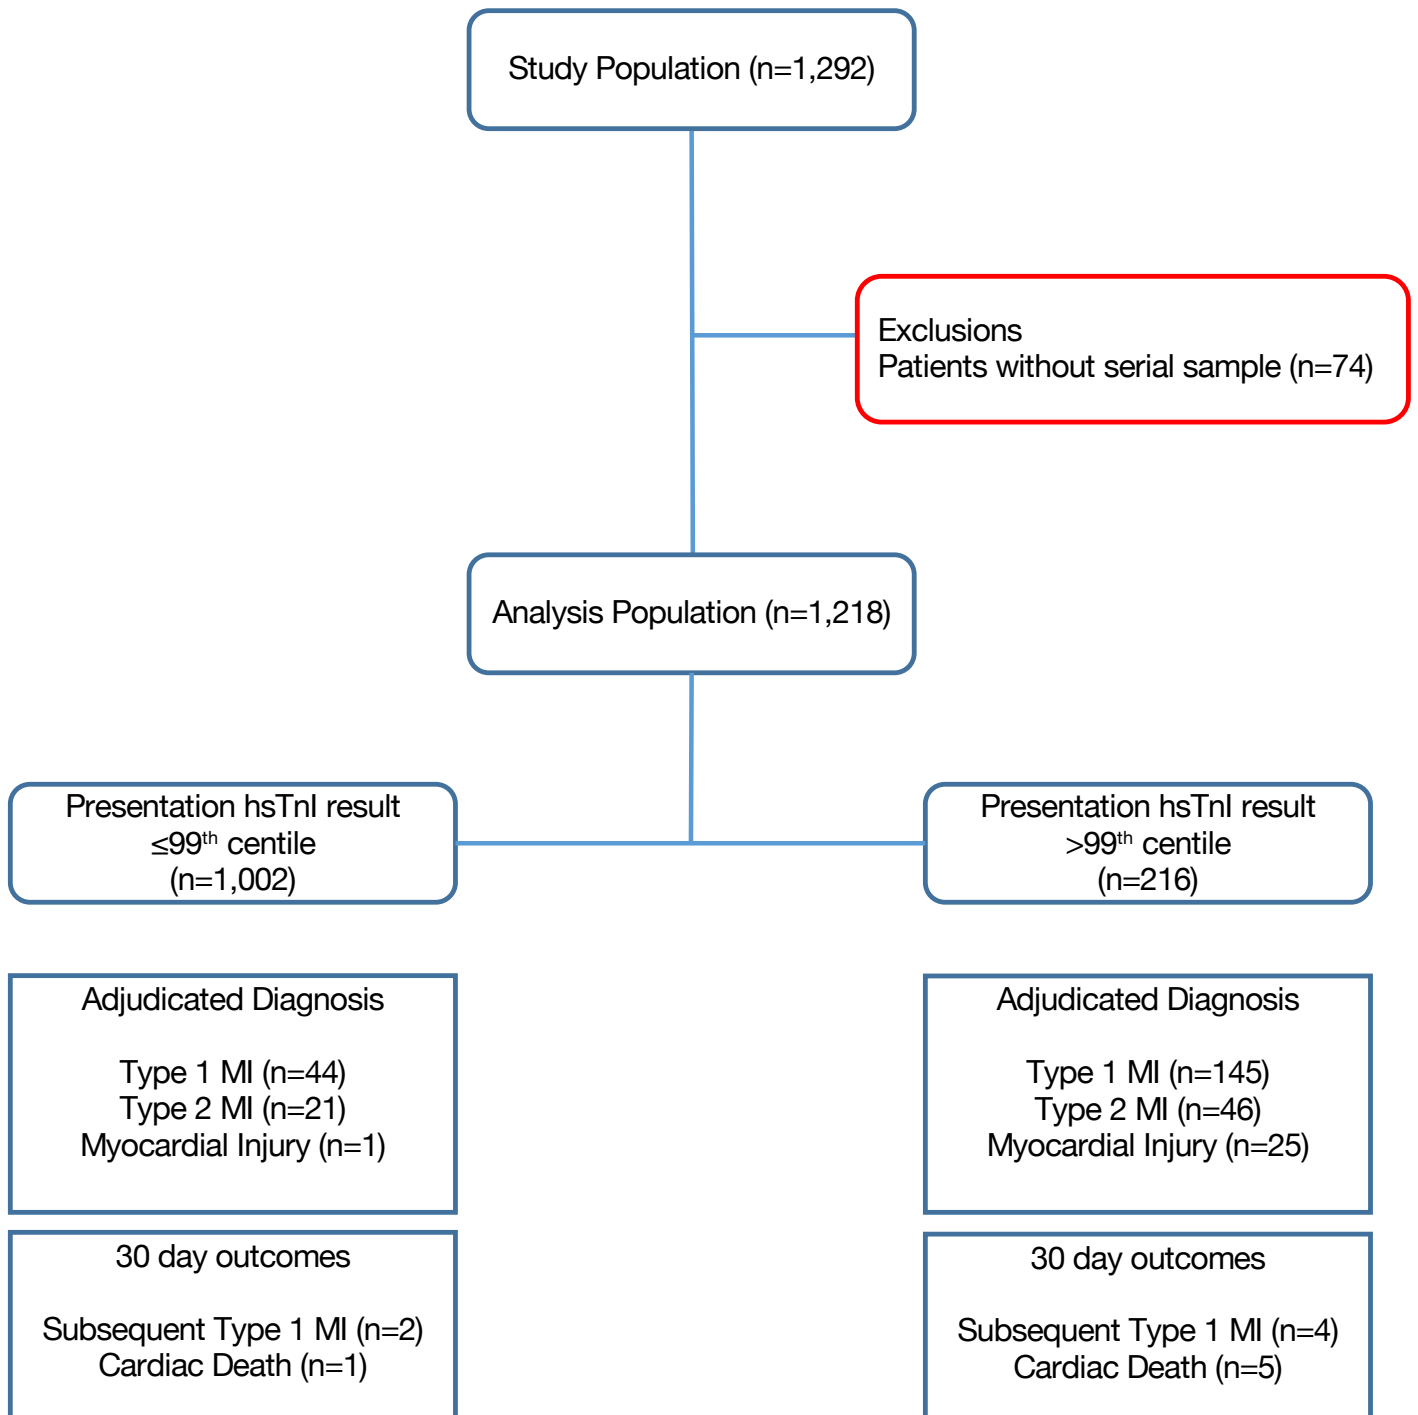

**Figure S2. Diagnostic algorithm of the High-STEACS pathway**

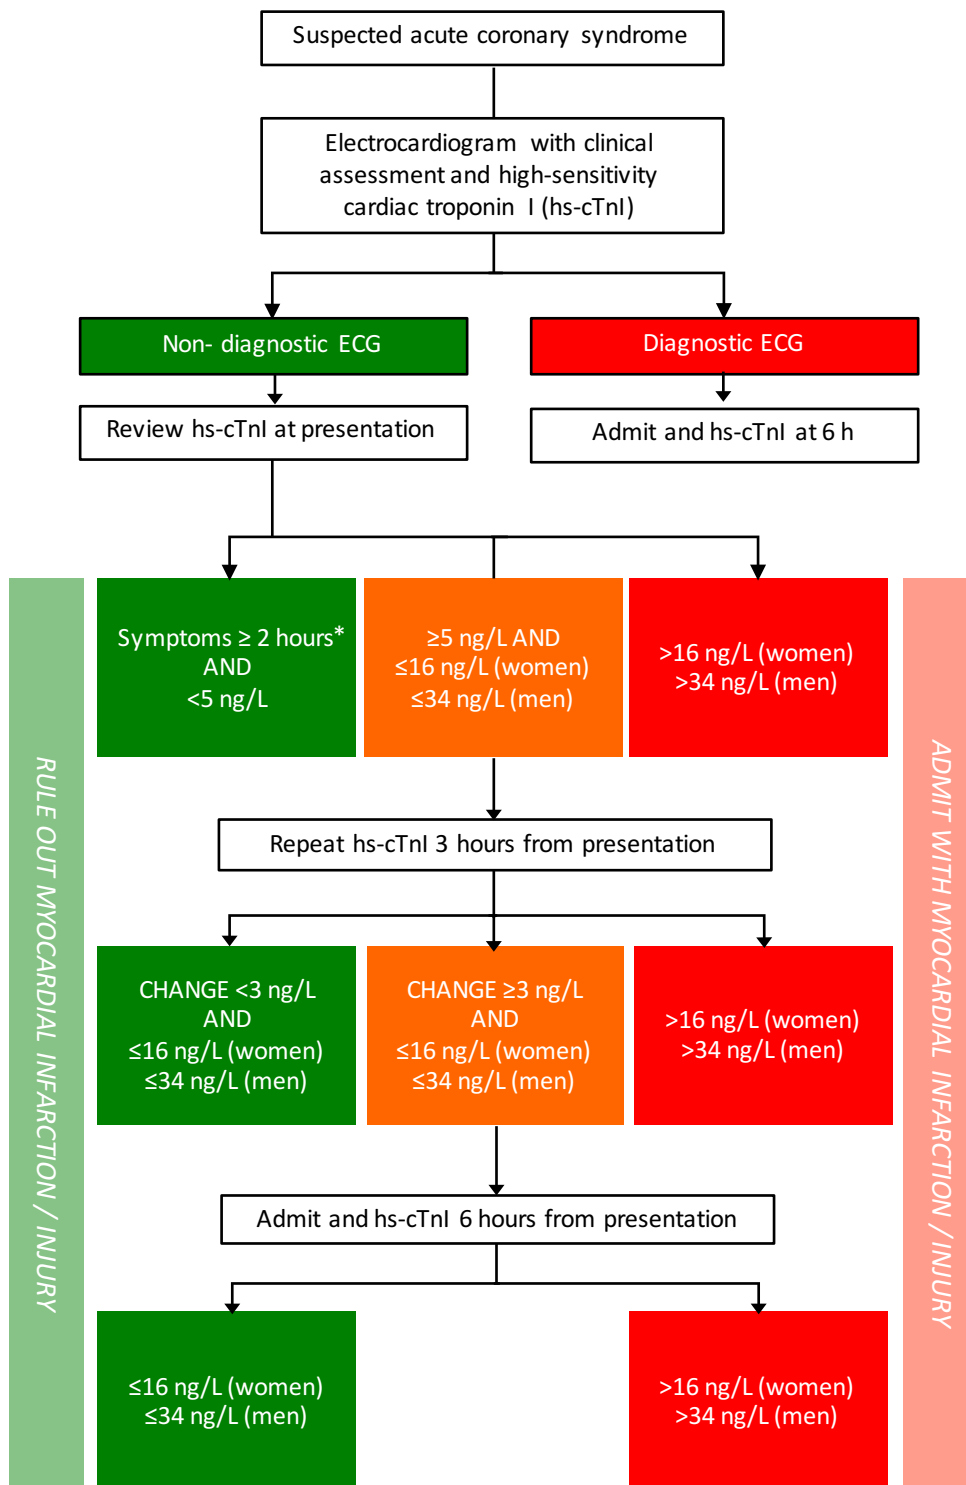

*Diagnostic algorithm of the High-STEACS pathway, currently being evaluated as part of a multi-centre stepped-wedge cluster randomised trial in unselected consecutive patients across Scotland. \*In the High-STEACS pathway, patients with cardiac troponin concentrations <5 ng/L who present within two hours of symptom onset are retested at three hours.*
